# Supplementary material
Source: PubMed Central journal article supplement (PMC6029711)
Supplement: NIHMS932217-supplement-SDC_clean.pdf [file NIHMS932217-supplement-SDC_clean.pdf]

**Table S1: Demographic characteristics of all single and multiple living donors at the time of donation by donated organ type**

|                                         | <b>Kidney</b>       | <b>Liver</b>        | <b>Lung</b>         | <b>Small bowel</b>  | <b>Pancreas</b>     |
|-----------------------------------------|---------------------|---------------------|---------------------|---------------------|---------------------|
| N (%)                                   | 141887 (95.6)       | 5948 (4.0)          | 479 (0.3)           | 37 (0.0)            | 22 (0.0)            |
| % Female                                | 59.4                | 52                  | 37                  | 40.5                | 72.7                |
| Median age years, (IQR)                 | 40.6<br>(32.1-49.2) | 34.7<br>(27.9-43.1) | 39.3<br>(29.8-46.0) | 34.5<br>(25.2-46.1) | 36.3<br>(30.7-50.4) |
| Median BMI (IQR)                        | 25.2<br>(20.4-28.3) | 25.1<br>(22.2-28.0) | 17.3<br>(15.7-18.3) | NA                  | 24.9<br>(19.4-25.1) |
| Race/Ethnicity                          |                     |                     |                     |                     |                     |
| % White                                 | 70.5                | 77.6                | 88.5                | 62.2                | 100                 |
| % African-American                      | 12.4                | 5.7                 | 1.3                 | 21.6                | 0                   |
| % Hispanic                              | 12.6                | 12.8                | 8.1                 | 16.2                | 0                   |
| % Other                                 | 3.6                 | 3.2                 | 1.9                 | 0                   | 0                   |
| Relationship to first or only recipient |                     |                     |                     |                     |                     |
| % Related                               | 76.5                | 80                  | 73.1                | 100                 | 95.5                |
| % Directed                              | 21.2                | 18.7                | 25.9                | 0                   | 4.5                 |
| % Nondirected                           | 1.3                 | 0.5                 | 0.6                 | 0                   | 0                   |
